# Supplementary material
Source: MDPI journal article supplement (https://www.mdpi.com/2072-4292/15/23/5460)
Supplement: s1 [file s1]

Supplementary maps and graphs:

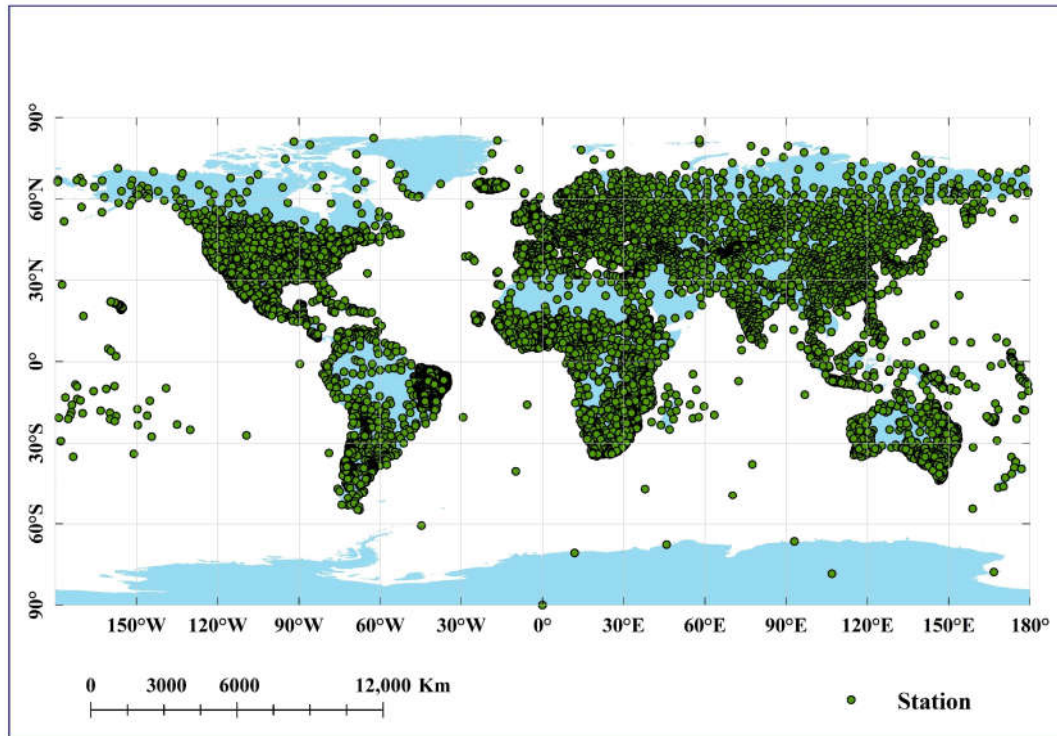

Figure S1. Map of CRU data site locations.

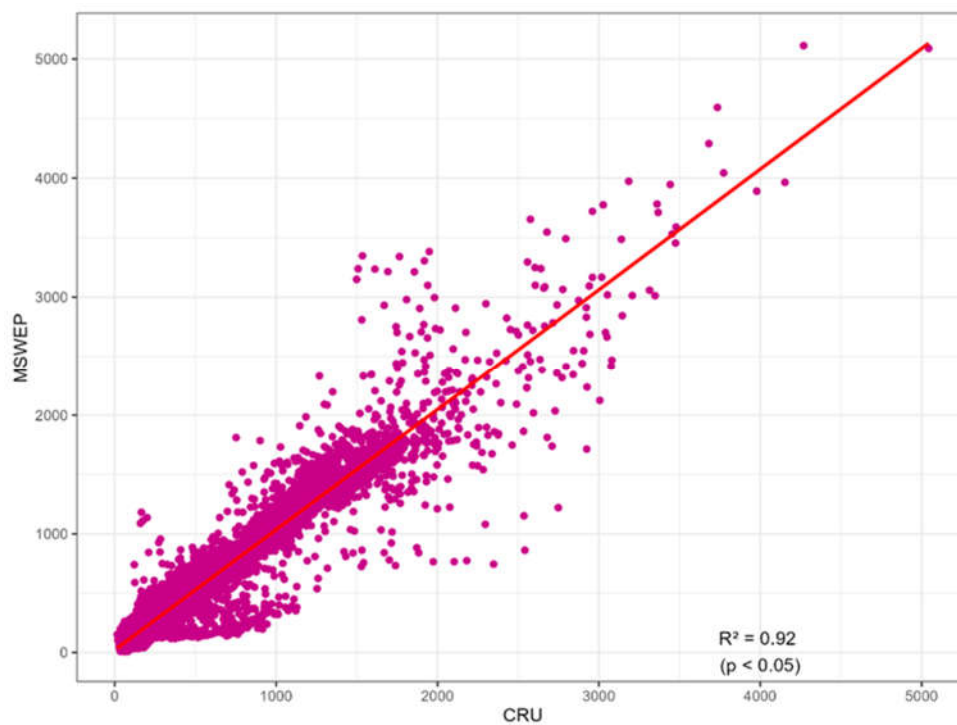

Figure S2. Fitted plot between CRU data and MSWEP data.

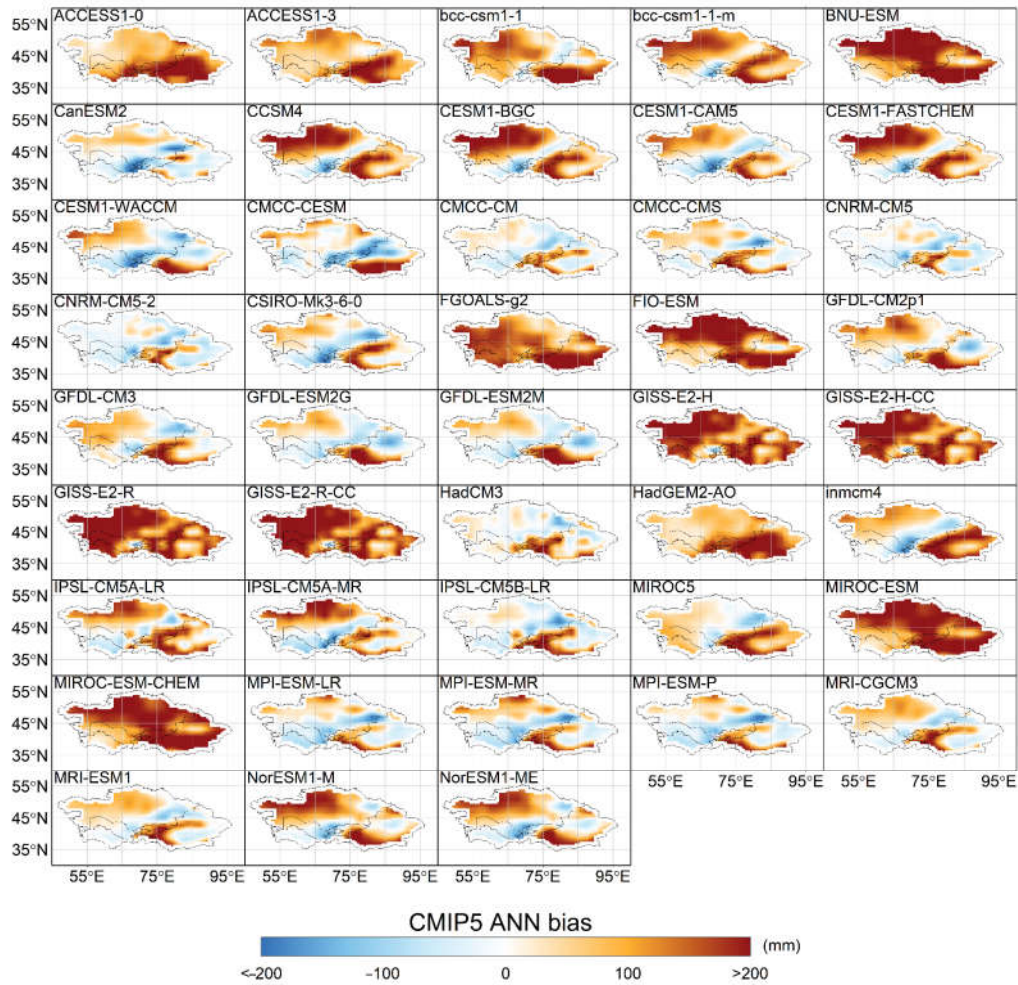

**Figure S3.** Spatial distribution of precipitation bias between CRU observations and CMIP5 models for ANN from 1959 to 2005.

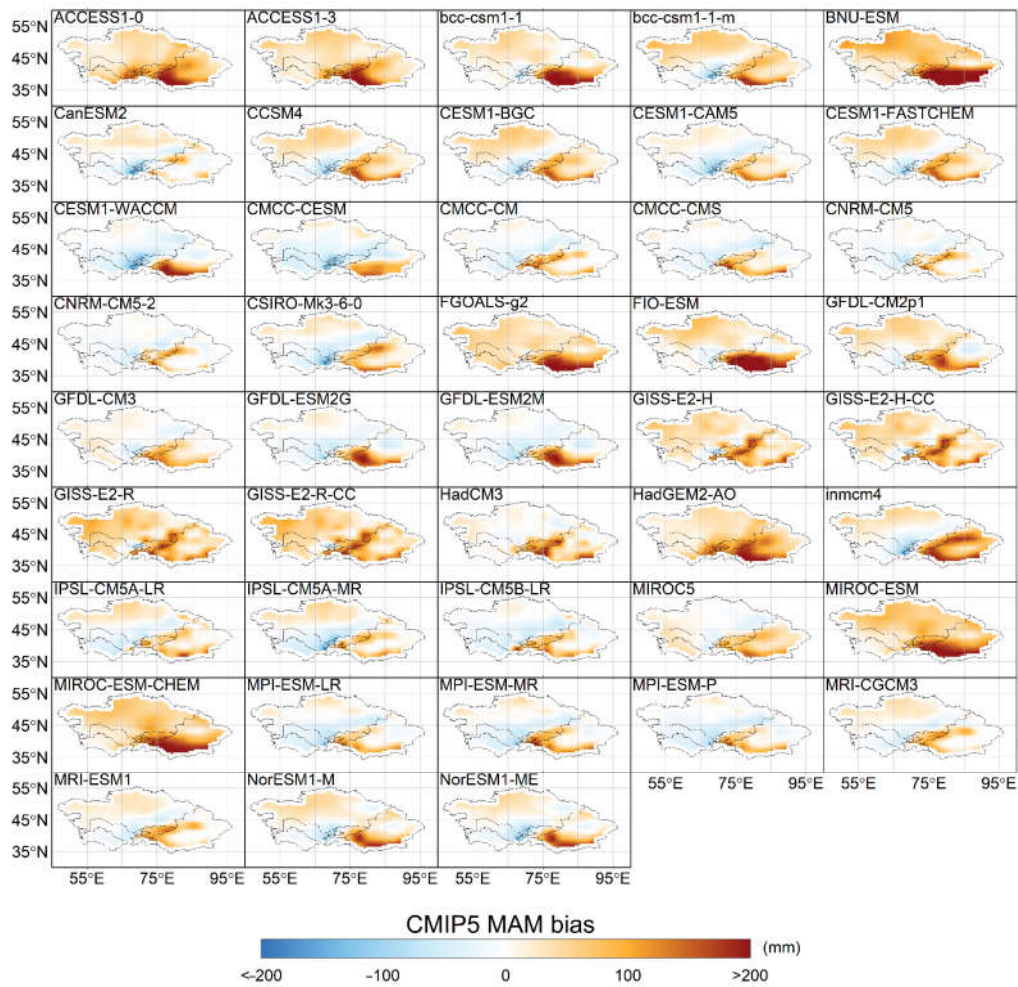

**Figure S4.** Same as Figure S3 but for MAM.



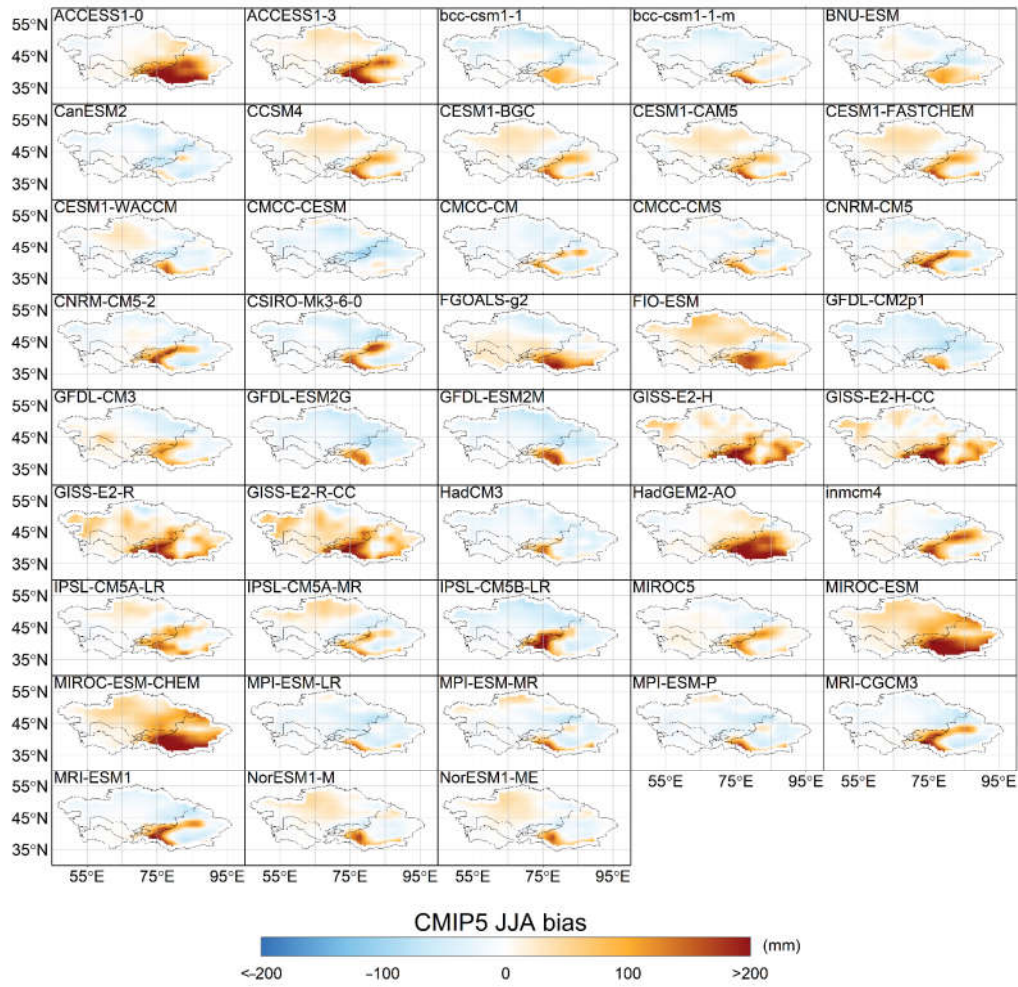

**Figure S5.** Same as Figure S3 but for JJA.

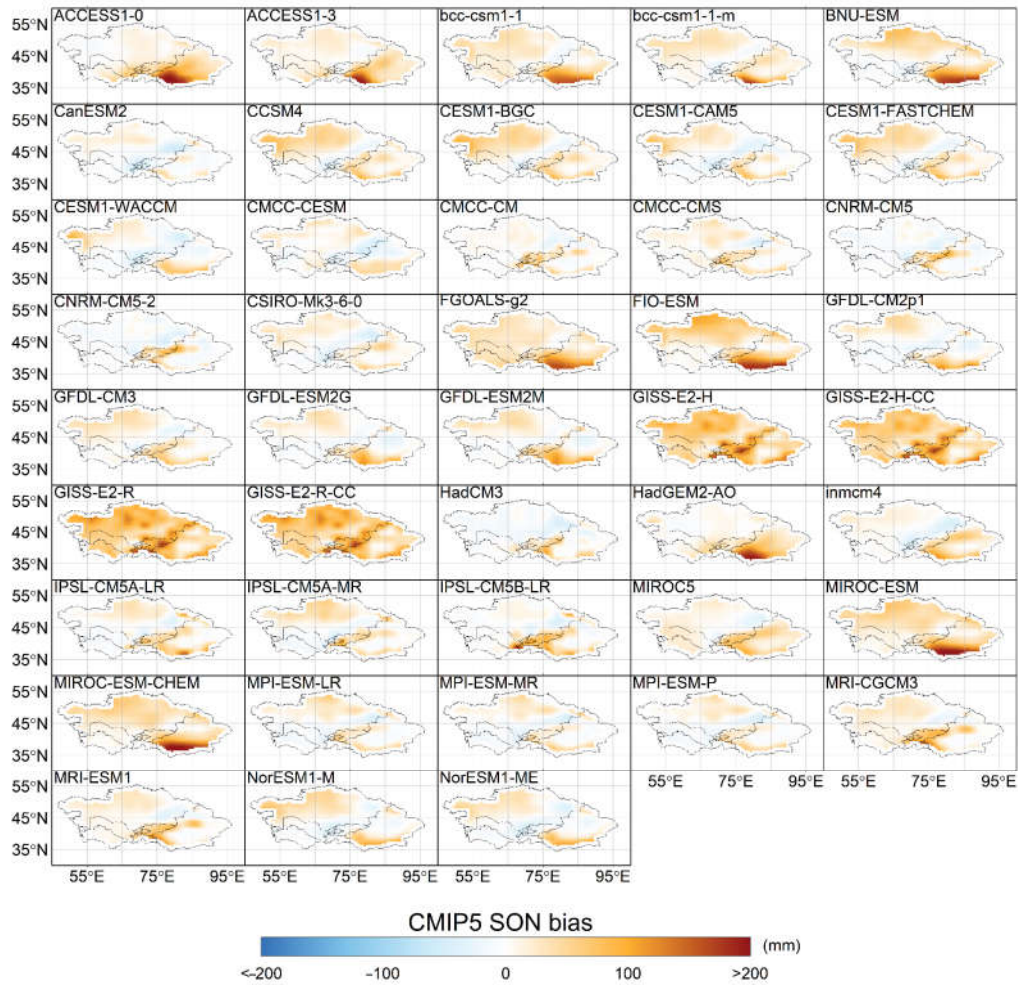

**Figure S6.** Same as Figure S3 but for SON.

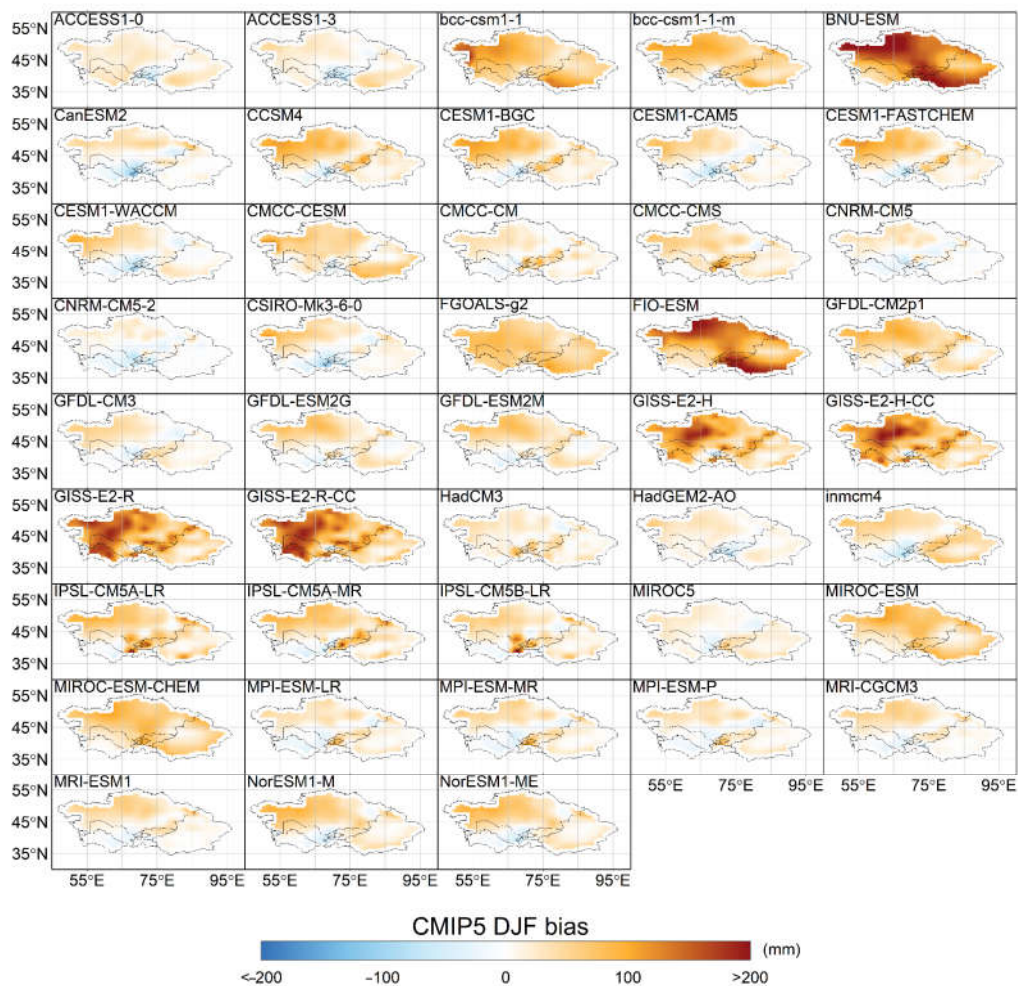

Figure S7. Same as Figure S3 but for DJF.



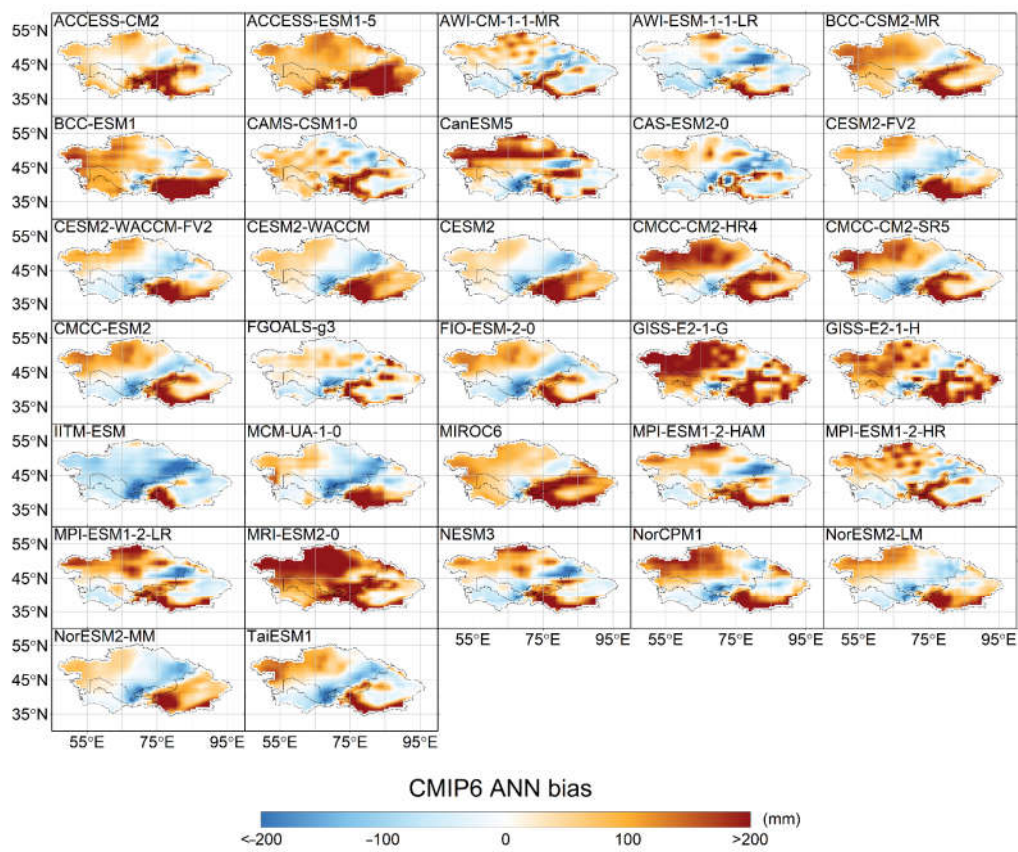

**Figure S8.** Spatial distribution of precipitation bias between CRU observations and CMIP6 models for ANN from 1959 to 2005.

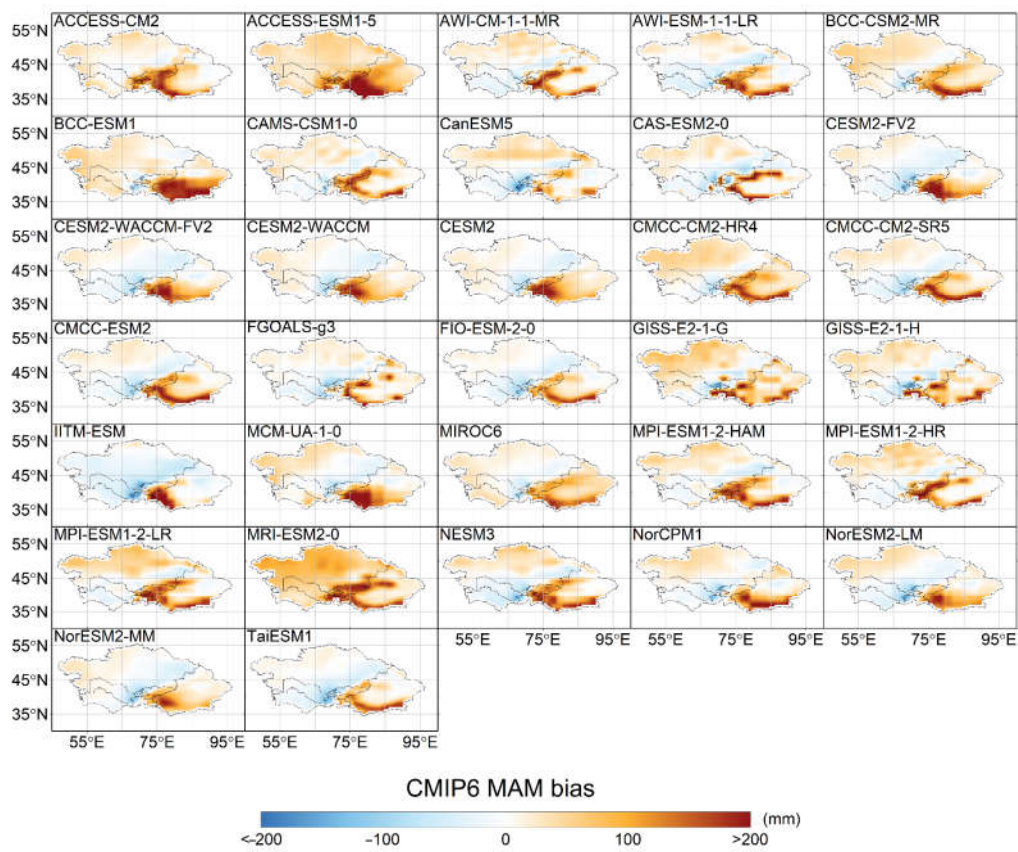

Figure S9. Same as Figure S8 but for MAM.



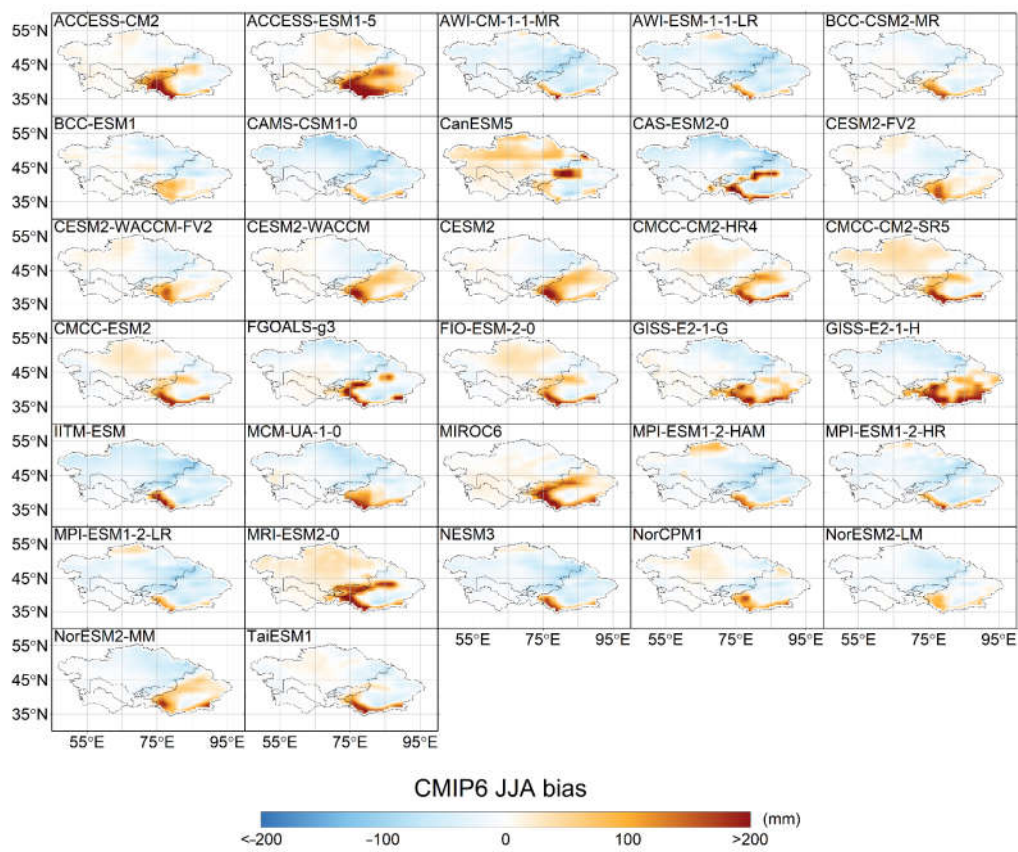

Figure S10. Same as Figure S8 but for JJA.

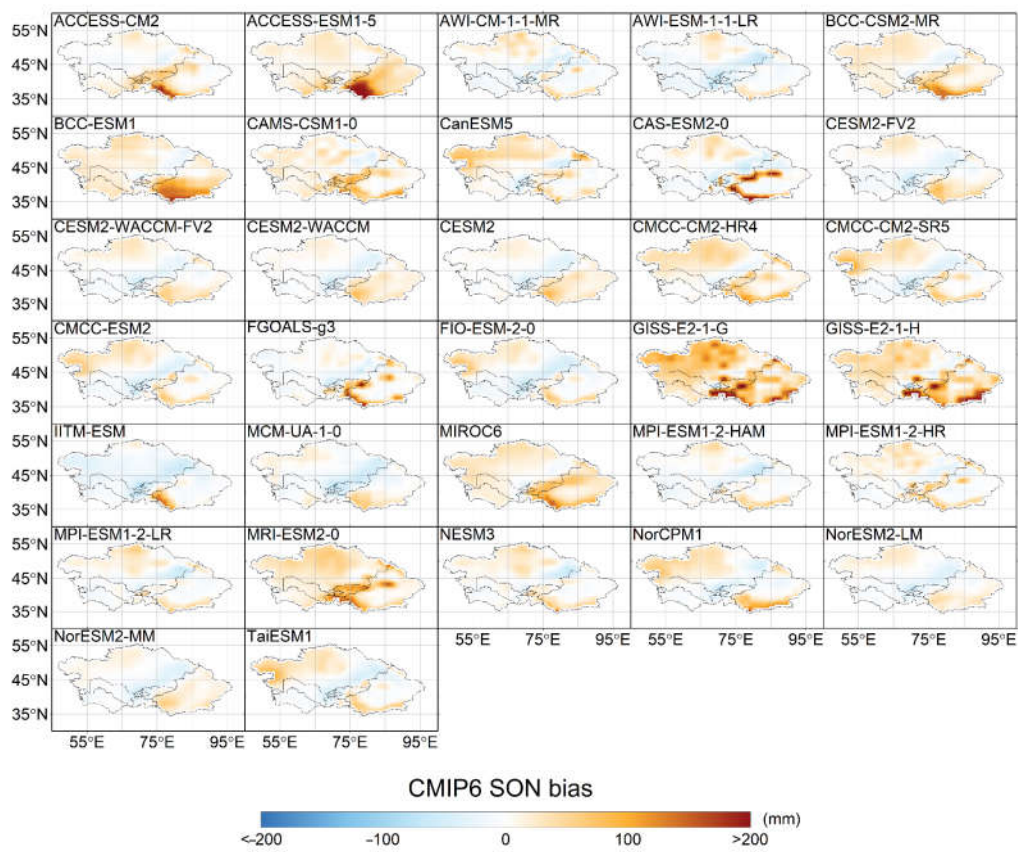

**Figure S11.** Same as Figure S8 but for SON.

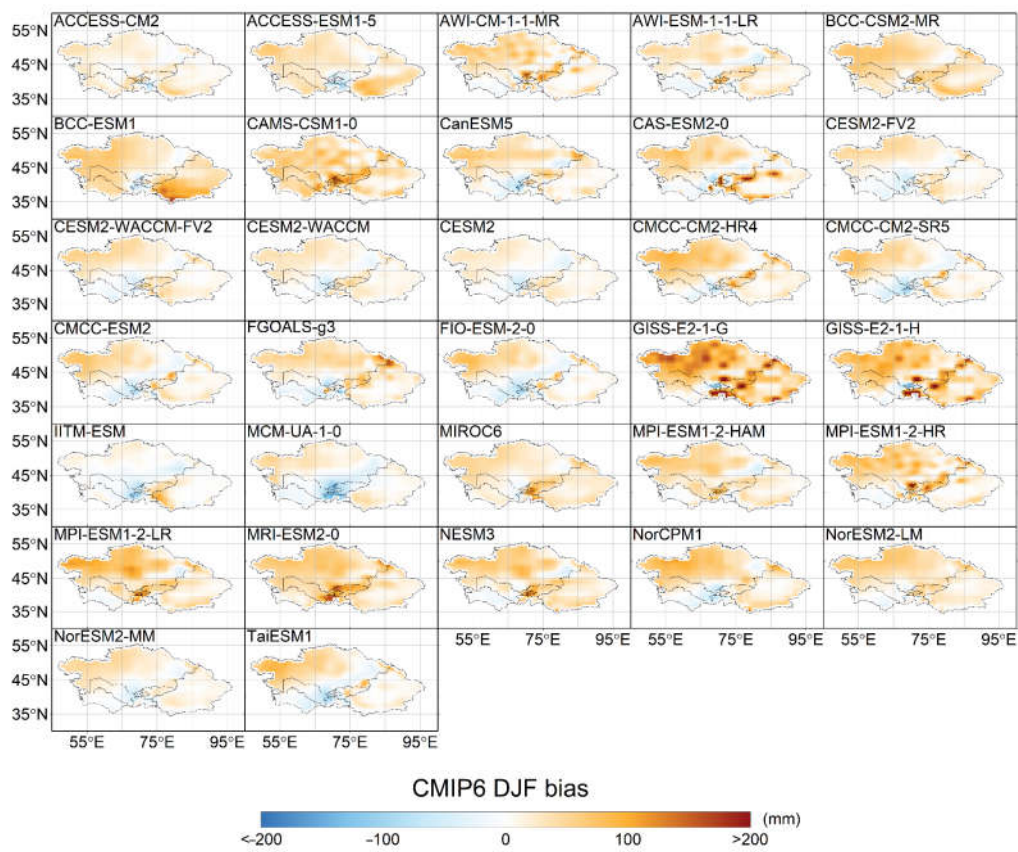

Figure S12. Same as Figure S8 but for DJF.



**Table S1.** Summary of CMIP5 models used in this study.

| <b>Models</b>  | <b>Institution</b>        | <b>Resolution (°)</b>                |
|----------------|---------------------------|--------------------------------------|
| ACCESS1-0      | CSIRO-BOM, Australia      | $1.875^{\circ} \times 1.25^{\circ}$  |
| ACCESS1-3      | CSIRO-BOM, Australia      | $1.875^{\circ} \times 1.25^{\circ}$  |
| bcc-csm1-1     | BCC, China                | $1.1^{\circ} \times 1.1^{\circ}$     |
| bcc-csm1-1-m   | BCC, China                | $2.8^{\circ} \times 2.8^{\circ}$     |
| BNU-ESM        | GCESS, China              | $2.8^{\circ} \times 2.8^{\circ}$     |
| CanESM2        | CCCMA, Canada             | $2.8^{\circ} \times 2.8^{\circ}$     |
| CCSM4          | NCAR, USA                 | $1.25^{\circ} \times 0.9^{\circ}$    |
| CESM1-BGC      | NCAR, USA                 | $1.25^{\circ} \times 0.9^{\circ}$    |
| CESM1-CAM5     | NCAR, USA                 | $1.25^{\circ} \times 0.9^{\circ}$    |
| CESM1-FASTCHEM | NCAR, USA                 | $1.3^{\circ} \times 0.9^{\circ}$     |
| CESM1-WACCM    | NCAR, USA                 | $2.5^{\circ} \times 1.9^{\circ}$     |
| CMCC-CESM      | CMCC, Italy               | $3.75^{\circ} \times 3.75^{\circ}$   |
| CMCC-CM        | CMCC, Italy               | $0.75^{\circ} \times 0.75^{\circ}$   |
| CMCC-CMS       | CMCC, Italy               | $1.875^{\circ} \times 1.875^{\circ}$ |
| CNRM-CM5       | CNRM-CERFACS,<br>France   | $1.4^{\circ} \times 1.4^{\circ}$     |
| CNRM-CM5-2     | CNRM-CERFACS,<br>France   | $1.4^{\circ} \times 1.4^{\circ}$     |
| CSIRO-Mk3-6-0  | CSIRO-QCCCE,<br>Australia | $1.875^{\circ} \times 1.875^{\circ}$ |
| FGOALS-g2      | LASG-CESS, China          | $2.8125^{\circ} \times 3^{\circ}$    |
| FIO-ESM        | FIO, China                | $2.8^{\circ} \times 2.8^{\circ}$     |
| GFDL-CM2p1     | NOAA GFDL, USA            | $2.5^{\circ} \times 2.0^{\circ}$     |
| GFDL-CM3       | NOAA GFDL, USA            | $2.5^{\circ} \times 2.0^{\circ}$     |
| GFDL-ESM2G     | NOAA GFDL, USA            | $2.5^{\circ} \times 2.0^{\circ}$     |
| GFDL-ESM2M     | NOAA GFDL, USA            | $2.5^{\circ} \times 2.0^{\circ}$     |
| GISS-E2-H      | NASA GISS, USA            | $2.5^{\circ} \times 2.0^{\circ}$     |
| GISS-E2-H-CC   | NASA GISS, USA            | $2.5^{\circ} \times 2.0^{\circ}$     |
| GISS-E2-R      | NASA GISS, USA            | $2.5^{\circ} \times 2.0^{\circ}$     |

|                |                    |                                      |
|----------------|--------------------|--------------------------------------|
| GISS-E2-R-CC   | NASA GISS, USA     | $2.5^{\circ} \times 2.0^{\circ}$     |
| HadCM3         | MOHC, UK           | $3.8^{\circ} \times 2.5^{\circ}$     |
| HadGEM2-AO     | NIMR/KMA, Korea/UK | $1.875^{\circ} \times 1.24^{\circ}$  |
| inmcm4         | UNM, Russia        | $1.4^{\circ} \times 1.4^{\circ}$     |
| IPSL-CM5A-LR   | IPSL, France       | $3.75^{\circ} \times 1.875^{\circ}$  |
| IPSL-CM5A-MR   | IPSL, France       | $2.5^{\circ} \times 1.25^{\circ}$    |
| IPSL-CM5B-LR   | IPSL, France       | $3.75^{\circ} \times 1.875^{\circ}$  |
| MIROC5         | MIROC, Japan       | $1.4^{\circ} \times 1.4^{\circ}$     |
| MIROC-ESM      | MIROC, Japan       | $2.8^{\circ} \times 2.8^{\circ}$     |
| MIROC-ESM-CHEM | MIROC, Japan       | $2.8^{\circ} \times 2.8^{\circ}$     |
| MPI-ESM-LR     | MPI-M, Germany     | $1.875^{\circ} \times 1.875^{\circ}$ |
| MPI-ESM-MR     | MPI-M, Germany     | $1.875^{\circ} \times 1.875^{\circ}$ |
| MPI-ESM-P      | MPI-M, Germany     | $1.875^{\circ} \times 1.875^{\circ}$ |
| MRI-CGCM3      | MRI, Japan         | $1.125^{\circ} \times 1.125^{\circ}$ |
| MRI-ESM1       | MRI, Japan         | $1.125^{\circ} \times 1.125^{\circ}$ |
| NorESM1-M      | NCC, Norway        | $2.5^{\circ} \times 1.875^{\circ}$   |
| NorESM1-ME     | NCC, Norway        | $2.5^{\circ} \times 1.875^{\circ}$   |

---

**Table S2.** Summary of CMIP6 models used in this study.

| <b>Models</b>   | <b>Institution</b> | <b>Resolution (°)</b>                |
|-----------------|--------------------|--------------------------------------|
| ACCESS-CM2      | CSIRO, Australia   | $1.875^{\circ} \times 1.25^{\circ}$  |
| ACCESS-ESM1-5   | CSIRO, Australia   | $1.875^{\circ} \times 1.24^{\circ}$  |
| AWI-CM-1-1-MR   | AWI, Germany       | $0.9^{\circ} \times 0.9^{\circ}$     |
| AWI-ESM-1-1-LR  | AWI, Germany       | $1.875^{\circ} \times 1.875^{\circ}$ |
| BCC-CSM2-MR     | BCC, China         | $1.125^{\circ} \times 1.1^{\circ}$   |
| BCC-ESM1        | BCC, China         | $2.8125^{\circ} \times 2.8^{\circ}$  |
| CAMS-CSM1-0     | CAMS, China        | $1.125^{\circ} \times 1.1^{\circ}$   |
| CanESM5         | CCCMA, Canada      | $2.8125^{\circ} \times 2.8^{\circ}$  |
| CAS-ESM2-0      | CAS, China         | $1.4^{\circ} \times 1.4^{\circ}$     |
| CESM2           | NCAR, USA          | $1.25^{\circ} \times 0.9^{\circ}$    |
| CESM2-FV2       | NCAR, USA          | $2.5^{\circ} \times 1.875^{\circ}$   |
| CESM2-WACCM     | NCAR, USA          | $1.25^{\circ} \times 0.9^{\circ}$    |
| CESM2-WACCM-FV2 | NCAR, USA          | $2.5^{\circ} \times 1.875^{\circ}$   |
| CMCC-CM2-HR4    | CMCC, Italy        | $1.25^{\circ} \times 0.9^{\circ}$    |
| CMCC-CM2-SR5    | CMCC, Italy        | $1.25^{\circ} \times 0.9^{\circ}$    |
| CMCC-ESM2       | CMCC, Italy        | $1.25^{\circ} \times 0.9^{\circ}$    |
| FGOALS-g3       | CAS, China         | $2^{\circ} \times 2.5^{\circ}$       |
| FIO-ESM-2-0     | FIO-QLNM, China    | $1.25^{\circ} \times 0.9^{\circ}$    |
| GISS-E2-1-G     | NASA-GISS, USA     | $2.5^{\circ} \times 2^{\circ}$       |
| GISS-E2-1-H     | NASA-GISS, USA     | $2.5^{\circ} \times 2^{\circ}$       |
| IITM-ESM        | CCCR-IITM, India   | $1.875^{\circ} \times 1.9^{\circ}$   |
| MCM-UA-1-0      | UA, USA            | $3.75^{\circ} \times 2.2^{\circ}$    |
| MIROC6          | MIROC, Japan       | $1.4^{\circ} \times 1.4^{\circ}$     |
| MPI-ESM-1-2-HAM | MPI-M, Germany     | $1.875^{\circ} \times 2^{\circ}$     |
| MPI-ESM-1-2-HR  | MPI-M, Germany     | $0.9^{\circ} \times 0.9^{\circ}$     |
| MPI-ESM-1-2-LR  | MPI-M, Germany     | $1.875^{\circ} \times 2^{\circ}$     |
| MRI-ESM2-0      | MRI, Japan         | $1.125^{\circ} \times 1.1^{\circ}$   |
| NESM3           | NUIST, China       | $1.875^{\circ} \times 1.9^{\circ}$   |
| NorCPM1         | NCC, Norway        | $2.5^{\circ} \times 1.9^{\circ}$     |
| NorESM2-LM      | NCC, Norway        | $2.5^{\circ} \times 1.9^{\circ}$     |
| NorESM2-MM      | NCC, Norway        | $1.25^{\circ} \times 0.9^{\circ}$    |
| TaiESM1         | AS-RCEC, China     | $1.25^{\circ} \times 0.9^{\circ}$    |



**Table S3.** TSS of MME and each model under CMIP5. ALL, CA, and XJ represent the entire study area, the five Central Asian countries, and the Xinjiang region, respectively. ANN, MAM, JJA, SON, and DJF represent the annual average, spring, summer, autumn, and winter precipitation, respectively. The highest and lowest TSS values for MME and each GCM are shown in bold and underlined, respectively.

| CMIP5               | ALL   |       |       |       |       | CA    |       |       |       |       | XJ    |       |       |       |       |
|---------------------|-------|-------|-------|-------|-------|-------|-------|-------|-------|-------|-------|-------|-------|-------|-------|
| Model/ensemble      | ANN   | MAM   | JJA   | SON   | DJF   | ANN   | MAM   | JJA   | SON   | DJF   | ANN   | MAM   | JJA   | SON   | DJF   |
| <b>MME</b>          | 0.641 | 0.659 | 0.617 | 0.647 | 0.784 | 0.802 | 0.830 | 0.891 | 0.792 | 0.734 | 0.225 | 0.308 | 0.162 | 0.182 | 0.631 |
| ACCESS1-0           | 0.348 | 0.519 | 0.208 | 0.264 | 0.791 | 0.738 | 0.707 | 0.654 | 0.683 | 0.715 | 0.072 | 0.172 | 0.037 | 0.041 | 0.284 |
| ACCESS1-3           | 0.352 | 0.424 | 0.257 | 0.342 | 0.699 | 0.718 | 0.684 | 0.663 | 0.730 | 0.606 | 0.066 | 0.111 | 0.026 | 0.056 | 0.414 |
| <b>bcc-csm1-1</b>   | 0.388 | 0.344 | 0.552 | 0.345 | 0.536 | 0.682 | 0.761 | 0.654 | 0.723 | 0.438 | 0.077 | 0.080 | 0.220 | 0.042 | 0.255 |
| <b>bcc-csm1-1-m</b> | 0.522 | 0.506 | 0.515 | 0.467 | 0.655 | 0.728 | 0.587 | 0.809 | 0.765 | 0.553 | 0.158 | 0.254 | 0.108 | 0.087 | 0.393 |
| BNU-ESM             | 0.303 | 0.225 | 0.683 | 0.281 | 0.330 | 0.582 | 0.671 | 0.881 | 0.552 | 0.319 | 0.046 | 0.042 | 0.221 | 0.033 | 0.114 |
| CanESM2             | 0.690 | 0.643 | 0.726 | 0.711 | 0.624 | 0.667 | 0.617 | 0.829 | 0.698 | 0.420 | 0.387 | 0.420 | 0.327 | 0.365 | 0.735 |
| CCSM4               | 0.548 | 0.546 | 0.580 | 0.565 | 0.534 | 0.603 | 0.663 | 0.904 | 0.562 | 0.377 | 0.225 | 0.278 | 0.134 | 0.212 | 0.412 |
| CESM1-BGC           | 0.564 | 0.567 | 0.607 | 0.559 | 0.547 | 0.603 | 0.654 | 0.915 | 0.546 | 0.399 | 0.237 | 0.301 | 0.148 | 0.213 | 0.449 |
| CESM1-CAM5          | 0.583 | 0.582 | 0.563 | 0.589 | 0.637 | 0.671 | 0.717 | 0.910 | 0.571 | 0.478 | 0.219 | 0.300 | 0.105 | 0.234 | 0.529 |
| CESM1-FASTCHEM      | 0.556 | 0.573 | 0.585 | 0.580 | 0.522 | 0.605 | 0.678 | 0.907 | 0.588 | 0.354 | 0.230 | 0.296 | 0.137 | 0.210 | 0.437 |
| CESM1-WACCM         | 0.460 | 0.340 | 0.655 | 0.514 | 0.577 | 0.600 | 0.649 | 0.873 | 0.545 | 0.370 | 0.133 | 0.107 | 0.165 | 0.139 | 0.591 |
| CMCC-CESM           | 0.561 | 0.413 | 0.741 | 0.668 | 0.583 | 0.664 | 0.605 | 0.839 | 0.692 | 0.481 | 0.136 | 0.164 | 0.303 | 0.162 | 0.292 |
| CMCC-CM             | 0.516 | 0.553 | 0.560 | 0.536 | 0.635 | 0.565 | 0.585 | 0.865 | 0.543 | 0.576 | 0.177 | 0.283 | 0.120 | 0.174 | 0.340 |
| CMCC-CMS            | 0.593 | 0.574 | 0.627 | 0.660 | 0.725 | 0.658 | 0.682 | 0.857 | 0.654 | 0.673 | 0.201 | 0.224 | 0.152 | 0.278 | 0.538 |
| CNRM-CM5            | 0.528 | 0.654 | 0.345 | 0.566 | 0.727 | 0.570 | 0.698 | 0.524 | 0.555 | 0.613 | 0.198 | 0.360 | 0.083 | 0.243 | 0.677 |
| CNRM-CM5-2          | 0.526 | 0.657 | 0.347 | 0.552 | 0.724 | 0.575 | 0.703 | 0.525 | 0.558 | 0.599 | 0.196 | 0.357 | 0.084 | 0.215 | 0.683 |
| CSIRO-Mk3-6-0       | 0.489 | 0.471 | 0.365 | 0.666 | 0.535 | 0.647 | 0.643 | 0.765 | 0.695 | 0.311 | 0.169 | 0.218 | 0.075 | 0.297 | 0.678 |
| FGOALS-g2           | 0.420 | 0.461 | 0.432 | 0.391 | 0.785 | 0.746 | 0.848 | 0.599 | 0.763 | 0.776 | 0.092 | 0.122 | 0.122 | 0.056 | 0.541 |
| FIO-ESM             | 0.261 | 0.246 | 0.617 | 0.255 | 0.306 | 0.514 | 0.664 | 0.837 | 0.505 | 0.359 | 0.038 | 0.051 | 0.154 | 0.025 | 0.070 |
| GFDL-CM2p1          | 0.618 | 0.620 | 0.576 | 0.474 | 0.604 | 0.753 | 0.766 | 0.785 | 0.634 | 0.539 | 0.161 | 0.192 | 0.127 | 0.072 | 0.336 |
| GFDL-CM3            | 0.618 | 0.654 | 0.564 | 0.609 | 0.779 | 0.679 | 0.732 | 0.701 | 0.655 | 0.714 | 0.240 | 0.329 | 0.205 | 0.186 | 0.618 |
| GFDL-ESM2G          | 0.589 | 0.534 | 0.554 | 0.541 | 0.670 | 0.770 | 0.784 | 0.741 | 0.701 | 0.573 | 0.140 | 0.149 | 0.132 | 0.091 | 0.409 |
| GFDL-ESM2M          | 0.535 | 0.501 | 0.469 | 0.495 | 0.632 | 0.751 | 0.770 | 0.686 | 0.656 | 0.520 | 0.116 | 0.134 | 0.101 | 0.081 | 0.386 |

|                |       |       |       |       |       |       |       |       |       |       |       |       |       |       |       |
|----------------|-------|-------|-------|-------|-------|-------|-------|-------|-------|-------|-------|-------|-------|-------|-------|
| GISS-E2-H      | 0.252 | 0.347 | 0.238 | 0.241 | 0.290 | 0.231 | 0.345 | 0.450 | 0.200 | 0.222 | 0.095 | 0.164 | 0.043 | 0.081 | 0.188 |
| GISS-E2-H-CC   | 0.232 | 0.373 | 0.205 | 0.205 | 0.260 | 0.204 | 0.377 | 0.338 | 0.162 | 0.202 | 0.092 | 0.172 | 0.040 | 0.073 | 0.170 |
| GISS-E2-R      | 0.250 | 0.348 | 0.313 | 0.239 | 0.244 | 0.217 | 0.340 | 0.449 | 0.198 | 0.195 | 0.107 | 0.174 | 0.086 | 0.087 | 0.145 |
| GISS-E2-R-CC   | 0.244 | 0.340 | 0.297 | 0.259 | 0.225 | 0.210 | 0.336 | 0.419 | 0.221 | 0.176 | 0.105 | 0.160 | 0.082 | 0.089 | 0.147 |
| HadCM3         | 0.580 | 0.545 | 0.667 | 0.566 | 0.761 | 0.663 | 0.662 | 0.840 | 0.651 | 0.731 | 0.195 | 0.203 | 0.183 | 0.175 | 0.451 |
| HadGEM2-AO     | 0.354 | 0.506 | 0.194 | 0.330 | 0.785 | 0.783 | 0.703 | 0.703 | 0.758 | 0.655 | 0.072 | 0.166 | 0.034 | 0.051 | 0.454 |
| inmcm4         | 0.430 | 0.380 | 0.545 | 0.475 | 0.586 | 0.630 | 0.600 | 0.844 | 0.682 | 0.491 | 0.209 | 0.264 | 0.165 | 0.177 | 0.487 |
| IPSL-CM5A-LR   | 0.483 | 0.547 | 0.599 | 0.467 | 0.470 | 0.519 | 0.637 | 0.782 | 0.502 | 0.398 | 0.170 | 0.240 | 0.208 | 0.138 | 0.231 |
| IPSL-CM5A-MR   | 0.439 | 0.476 | 0.612 | 0.472 | 0.379 | 0.384 | 0.449 | 0.797 | 0.386 | 0.278 | 0.246 | 0.362 | 0.166 | 0.296 | 0.340 |
| IPSL-CM5B-LR   | 0.436 | 0.527 | 0.351 | 0.364 | 0.474 | 0.432 | 0.604 | 0.423 | 0.339 | 0.386 | 0.173 | 0.226 | 0.129 | 0.123 | 0.308 |
| MIROC5         | 0.649 | 0.673 | 0.661 | 0.631 | 0.848 | 0.722 | 0.763 | 0.812 | 0.687 | 0.808 | 0.382 | 0.438 | 0.298 | 0.369 | 0.740 |
| MIROC-ESM      | 0.318 | 0.466 | 0.301 | 0.262 | 0.641 | 0.668 | 0.723 | 0.760 | 0.671 | 0.630 | 0.058 | 0.143 | 0.065 | 0.026 | 0.280 |
| MIROC-ESM-CHEM | 0.336 | 0.494 | 0.298 | 0.265 | 0.669 | 0.676 | 0.738 | 0.720 | 0.677 | 0.660 | 0.062 | 0.150 | 0.065 | 0.026 | 0.313 |
| MPI-ESM-LR     | 0.583 | 0.602 | 0.571 | 0.600 | 0.749 | 0.652 | 0.678 | 0.865 | 0.577 | 0.682 | 0.195 | 0.288 | 0.106 | 0.244 | 0.565 |
| MPI-ESM-MR     | 0.526 | 0.535 | 0.544 | 0.581 | 0.688 | 0.571 | 0.594 | 0.802 | 0.572 | 0.604 | 0.175 | 0.246 | 0.101 | 0.218 | 0.548 |
| MPI-ESM-P      | 0.570 | 0.607 | 0.543 | 0.605 | 0.753 | 0.657 | 0.689 | 0.845 | 0.621 | 0.688 | 0.182 | 0.290 | 0.098 | 0.209 | 0.558 |
| MRI-CGCM3      | 0.502 | 0.708 | 0.235 | 0.534 | 0.758 | 0.595 | 0.725 | 0.509 | 0.538 | 0.654 | 0.154 | 0.445 | 0.038 | 0.185 | 0.712 |
| MRI-ESM1       | 0.500 | 0.694 | 0.231 | 0.559 | 0.752 | 0.592 | 0.711 | 0.486 | 0.587 | 0.654 | 0.153 | 0.436 | 0.037 | 0.181 | 0.677 |
| NorESM1-M      | 0.510 | 0.475 | 0.664 | 0.480 | 0.592 | 0.621 | 0.712 | 0.891 | 0.571 | 0.407 | 0.153 | 0.156 | 0.180 | 0.100 | 0.429 |
| NorESM1-ME     | 0.501 | 0.450 | 0.679 | 0.463 | 0.578 | 0.626 | 0.675 | 0.891 | 0.629 | 0.405 | 0.148 | 0.160 | 0.190 | 0.088 | 0.406 |
| TSS MIN        | 0.23  | 0.23  | 0.19  | 0.20  | 0.22  | 0.20  | 0.34  | 0.34  | 0.16  | 0.18  | 0.04  | 0.04  | 0.03  | 0.02  | 0.07  |
| TSS MAX        | 0.69  | 0.70  | 0.74  | 0.71  | 0.85  | 0.80  | 0.85  | 0.92  | 0.79  | 0.81  | 0.39  | 0.45  | 0.33  | 0.37  | 0.74  |

**Table S4.** TSS of MME and each model under CMIP6. ALL, CA, and XJ represent the entire study area, the five Central Asian countries, and the Xinjiang region, respectively. ANN, MAM, JJA, SON, and DJF represent the annual average, spring, summer, autumn, and winter precipitation, respectively. The highest and lowest TSS values for MME and each GCM are shown in bold and underlined, respectively.

| CMIP6           | ALL   |       |       |       |       | CA    |       |       |       |       | XJ    |       |       |       |       |
|-----------------|-------|-------|-------|-------|-------|-------|-------|-------|-------|-------|-------|-------|-------|-------|-------|
| Model/ensemble  | ANN   | MAM   | JJA   | SON   | DJF   | ANN   | MAM   | JJA   | SON   | DJF   | ANN   | MAM   | JJA   | SON   | DJF   |
| <b>MME</b>      | 0.658 | 0.635 | 0.633 | 0.711 | 0.828 | 0.798 | 0.783 | 0.898 | 0.797 | 0.773 | 0.250 | 0.304 | 0.150 | 0.286 | 0.719 |
| ACCESS-CM2      | 0.509 | 0.579 | 0.336 | 0.550 | 0.876 | 0.705 | 0.693 | 0.703 | 0.700 | 0.859 | 0.115 | 0.205 | 0.034 | 0.130 | 0.608 |
| ACCESS-ESM1-5   | 0.309 | 0.372 | 0.263 | 0.295 | 0.704 | 0.769 | 0.729 | 0.736 | 0.726 | 0.653 | 0.056 | 0.090 | 0.032 | 0.045 | 0.277 |
| AWI-CM-1-1-MR   | 0.646 | 0.560 | 0.643 | 0.678 | 0.655 | 0.695 | 0.620 | 0.853 | 0.648 | 0.591 | 0.244 | 0.255 | 0.143 | 0.321 | 0.445 |
| AWI-ESM-1-1-LR  | 0.644 | 0.513 | 0.599 | 0.682 | 0.803 | 0.747 | 0.644 | 0.807 | 0.655 | 0.748 | 0.222 | 0.197 | 0.125 | 0.386 | 0.624 |
| BCC-CSM2-MR     | 0.624 | 0.608 | 0.695 | 0.539 | 0.791 | 0.786 | 0.787 | 0.882 | 0.742 | 0.770 | 0.213 | 0.260 | 0.195 | 0.123 | 0.480 |
| BCC-ESM1        | 0.420 | 0.419 | 0.694 | 0.363 | 0.594 | 0.676 | 0.779 | 0.808 | 0.734 | 0.584 | 0.099 | 0.118 | 0.260 | 0.052 | 0.250 |
| CAMS-CSM1-0     | 0.619 | 0.592 | 0.450 | 0.564 | 0.686 | 0.663 | 0.676 | 0.420 | 0.585 | 0.671 | 0.249 | 0.269 | 0.217 | 0.194 | 0.411 |
| CanESM5         | 0.590 | 0.615 | 0.537 | 0.620 | 0.707 | 0.575 | 0.605 | 0.757 | 0.555 | 0.579 | 0.281 | 0.385 | 0.158 | 0.368 | 0.647 |
| CAS-ESM2-0      | 0.129 | 0.227 | 0.072 | 0.165 | 0.491 | 0.201 | 0.343 | 0.170 | 0.261 | 0.439 | 0.029 | 0.069 | 0.012 | 0.029 | 0.193 |
| CESM2           | 0.599 | 0.579 | 0.558 | 0.722 | 0.865 | 0.747 | 0.668 | 0.890 | 0.817 | 0.825 | 0.275 | 0.310 | 0.153 | 0.491 | 0.728 |
| CESM2-FV2       | 0.581 | 0.482 | 0.707 | 0.671 | 0.789 | 0.736 | 0.701 | 0.907 | 0.765 | 0.716 | 0.200 | 0.185 | 0.205 | 0.268 | 0.588 |
| CESM2-WACCM     | 0.628 | 0.604 | 0.585 | 0.709 | 0.856 | 0.764 | 0.704 | 0.886 | 0.808 | 0.805 | 0.303 | 0.319 | 0.171 | 0.498 | 0.765 |
| CESM2-WACCM-FV2 | 0.630 | 0.525 | 0.726 | 0.747 | 0.787 | 0.746 | 0.710 | 0.898 | 0.791 | 0.720 | 0.239 | 0.215 | 0.226 | 0.376 | 0.576 |
| CMCC-CM2-HR4    | 0.585 | 0.570 | 0.602 | 0.608 | 0.639 | 0.677 | 0.691 | 0.938 | 0.666 | 0.512 | 0.231 | 0.280 | 0.152 | 0.201 | 0.502 |
| CMCC-CM2-SR5    | 0.549 | 0.486 | 0.590 | 0.613 | 0.625 | 0.639 | 0.680 | 0.902 | 0.549 | 0.475 | 0.185 | 0.179 | 0.111 | 0.330 | 0.518 |
| CMCC-ESM2       | 0.574 | 0.486 | 0.591 | 0.660 | 0.673 | 0.692 | 0.677 | 0.917 | 0.606 | 0.547 | 0.191 | 0.178 | 0.113 | 0.362 | 0.526 |
| FGOALS-g3       | 0.432 | 0.485 | 0.320 | 0.428 | 0.647 | 0.595 | 0.652 | 0.544 | 0.594 | 0.546 | 0.124 | 0.191 | 0.070 | 0.106 | 0.396 |
| FIO-ESM-2-0     | 0.605 | 0.579 | 0.614 | 0.632 | 0.632 | 0.697 | 0.754 | 0.913 | 0.590 | 0.493 | 0.222 | 0.245 | 0.126 | 0.308 | 0.523 |
| GISS-E2-1-G     | 0.275 | 0.383 | 0.389 | 0.221 | 0.264 | 0.274 | 0.399 | 0.649 | 0.206 | 0.210 | 0.093 | 0.181 | 0.103 | 0.055 | 0.124 |
| GISS-E2-1-H     | 0.251 | 0.362 | 0.265 | 0.203 | 0.299 | 0.282 | 0.385 | 0.629 | 0.228 | 0.237 | 0.078 | 0.160 | 0.066 | 0.039 | 0.148 |
| IITM-ESM        | 0.469 | 0.422 | 0.480 | 0.545 | 0.759 | 0.671 | 0.616 | 0.696 | 0.704 | 0.719 | 0.124 | 0.149 | 0.073 | 0.167 | 0.448 |
| MCM-UA-1-0      | 0.456 | 0.466 | 0.432 | 0.592 | 0.484 | 0.618 | 0.707 | 0.613 | 0.611 | 0.274 | 0.139 | 0.144 | 0.094 | 0.269 | 0.639 |
| MIROC6          | 0.577 | 0.643 | 0.498 | 0.617 | 0.792 | 0.712 | 0.784 | 0.816 | 0.719 | 0.746 | 0.253 | 0.401 | 0.124 | 0.257 | 0.628 |



|                        |       |       |       |       |       |       |       |       |       |       |       |       |       |       |       |
|------------------------|-------|-------|-------|-------|-------|-------|-------|-------|-------|-------|-------|-------|-------|-------|-------|
| <b>MPI-ESM-1-2-HAM</b> | 0.610 | 0.526 | 0.593 | 0.707 | 0.755 | 0.689 | 0.638 | 0.779 | 0.738 | 0.703 | 0.188 | 0.183 | 0.115 | 0.275 | 0.575 |
| <b>MPI-ESM-1-2-HR</b>  | 0.599 | 0.531 | 0.661 | 0.641 | 0.599 | 0.629 | 0.576 | 0.871 | 0.627 | 0.534 | 0.226 | 0.238 | 0.146 | 0.267 | 0.431 |
| <b>MPI-ESM-1-2-LR</b>  | 0.622 | 0.518 | 0.669 | 0.719 | 0.632 | 0.644 | 0.580 | 0.835 | 0.689 | 0.560 | 0.241 | 0.210 | 0.160 | 0.366 | 0.554 |
| <b>MRI-ESM2-0</b>      | 0.465 | 0.591 | 0.329 | 0.529 | 0.681 | 0.544 | 0.673 | 0.654 | 0.534 | 0.671 | 0.142 | 0.268 | 0.052 | 0.196 | 0.508 |
| <b>NESM3</b>           | 0.562 | 0.452 | 0.585 | 0.681 | 0.684 | 0.673 | 0.588 | 0.842 | 0.708 | 0.625 | 0.167 | 0.181 | 0.103 | 0.249 | 0.425 |
| <b>NorCPM1</b>         | 0.513 | 0.471 | 0.706 | 0.484 | 0.573 | 0.625 | 0.720 | 0.904 | 0.570 | 0.394 | 0.155 | 0.156 | 0.214 | 0.108 | 0.366 |
| <b>NorESM2-LM</b>      | 0.698 | 0.527 | 0.749 | 0.769 | 0.761 | 0.751 | 0.665 | 0.872 | 0.773 | 0.693 | 0.355 | 0.272 | 0.301 | 0.498 | 0.614 |
| <b>NorESM2-MM</b>      | 0.659 | 0.640 | 0.569 | 0.753 | 0.823 | 0.788 | 0.765 | 0.810 | 0.819 | 0.732 | 0.362 | 0.342 | 0.229 | 0.592 | 0.710 |
| <b>TaiESM1</b>         | 0.596 | 0.572 | 0.602 | 0.611 | 0.615 | 0.669 | 0.735 | 0.929 | 0.546 | 0.456 | 0.220 | 0.263 | 0.110 | 0.302 | 0.555 |
| <b>TSS MIN</b>         | 0.13  | 0.23  | 0.07  | 0.16  | 0.26  | 0.20  | 0.34  | 0.17  | 0.21  | 0.21  | 0.03  | 0.07  | 0.01  | 0.03  | 0.12  |
| <b>TSS MAX</b>         | 0.70  | 0.64  | 0.75  | 0.77  | 0.88  | 0.80  | 0.79  | 0.94  | 0.82  | 0.86  | 0.36  | 0.40  | 0.30  | 0.59  | 0.76  |
